# Supplementary material
Source: HighWire-hosted journal article supplement (https://bmjopen.bmj.com/content/12/3/e054490)
Supplement: inline-supplementary-material-1 [file inline-supplementary-material-1.pdf]

## Supplementary Data

**Supplementary Table 1:** Table of predictor variables chosen, the method of data collection, the subgroups at measurement and the subgroups at analysis

| Potential predictor               | Source of data                                                                             | Subgroups when measured                                                                                                                                                                                                                                    | Subgroups when analysed                                                                                                                                     |
|-----------------------------------|--------------------------------------------------------------------------------------------|------------------------------------------------------------------------------------------------------------------------------------------------------------------------------------------------------------------------------------------------------------|-------------------------------------------------------------------------------------------------------------------------------------------------------------|
| Final diagnosis                   | Clinical records                                                                           | Miscarriage (including molar)/<br>Ectopic pregnancy/<br>Resolved PUL                                                                                                                                                                                       | Miscarriage (including molar)/<br>Ectopic pregnancy/<br>Resolved PUL                                                                                        |
| Age (in years)                    | Clinical records<br><i>Date of birth to date of diagnosis</i>                              | Continuous                                                                                                                                                                                                                                                 | Continuous                                                                                                                                                  |
| IVF this pregnancy                | Clinical records                                                                           | Yes/No                                                                                                                                                                                                                                                     | Yes/No                                                                                                                                                      |
| Gestation at diagnosis            | Clinical records<br><i>Date of LMP (if known) or embryo transfer to date of diagnosis*</i> | Continuous/<br>Unknown                                                                                                                                                                                                                                     | Continuous/<br>Unknown                                                                                                                                      |
| Nights admission                  | Clinical records                                                                           | Continuous                                                                                                                                                                                                                                                 | Continuous                                                                                                                                                  |
| Days from first scan to diagnosis | Clinical records<br><i>Date of first scan to date of diagnosis*</i>                        | Continuous                                                                                                                                                                                                                                                 | Continuous                                                                                                                                                  |
| Final management                  | Clinical records<br><i>If more than one management, final management used</i>              | Conservative/<br>Medical management of miscarriage/<br>Medical management of ectopic or PPUL with methotrexate<br>Surgical management of miscarriage/<br>Salpingectomy for ectopic/<br>Salpingostomy for ectopic/<br>Other surgical management for ectopic | Conservative/<br>Medical management of miscarriage or ectopic/<br>Surgical management of miscarriage or ectopic                                             |
| Fetal heart (miscarriage only)    | Clinical records                                                                           | Yes/<br>Yes with concerns/<br>No                                                                                                                                                                                                                           | Yes/No                                                                                                                                                      |
| Highest level of education        | Questionnaire                                                                              | No formal qualifications/<br>GCSEs(or equivalent)/<br>A-levels (or equivalent)/<br>University degree or professional qualification/<br>Post-graduate or PhD                                                                                                | No formal qualifications/<br>GCSEs(or equivalent)/<br>A-levels (or equivalent)/<br>University degree or professional qualification/<br>Post-graduate or PhD |
| Time taken to conceive            | Questionnaire                                                                              | Not planned/<br>1-3 months/<br>3-6 months/<br>6-12 months/<br>13-18 months/                                                                                                                                                                                | Not planned/<br><=1 year/<br>>1year                                                                                                                         |

|                             |               |                                                                                                                                                             |                                                             |
|-----------------------------|---------------|-------------------------------------------------------------------------------------------------------------------------------------------------------------|-------------------------------------------------------------|
|                             |               | 19-24 months/<br>more than 2 years                                                                                                                          |                                                             |
| Psychiatric disorder        | Questionnaire | Currently/<br>In the past/<br>No                                                                                                                            | Currently/<br>In the past/<br>No                            |
| Any previous pregnancy loss | Questionnaire | Types and numbers of losses previously encountered (stillbirth, miscarriage, ectopic, termination for fetal anomaly, PUL)                                   | Yes/No                                                      |
| Any previous termination    | Questionnaire | Yes/No                                                                                                                                                      | Yes/No                                                      |
| Any live children           | Questionnaire | Yes – one/<br>Yes – two/<br>Yes- three/<br>Yes – four or more/<br>No                                                                                        | Yes/No                                                      |
| Ethnicity                   | Questionnaire | White British/<br>White Other/<br>South East Asian/<br>South Asian/<br>Asian Other/<br>Arab/<br>Black African/<br>Black Caribbean/<br>Black other/<br>Mixed | Asian/<br>Black/<br>Other/<br>White British/<br>White other |

\* Date of diagnosis as non-viable pregnancy: i.e. if diagnosed as molar on later histological diagnosis, date of scan confirming non-viability

Abbreviations: IVF – *in vitro* fertilisation

**Supplementary Table 2** AUC, Nagelkerke R<sup>2</sup> and p value for each morbidity (anxiety, depression and post-traumatic stress) separately. Displayed in order of strength of the obtained AUC for any morbidity.

| Predictor                                          | Anxiety             |                |         | Depression          |                |         | PTS                 |                |         |
|----------------------------------------------------|---------------------|----------------|---------|---------------------|----------------|---------|---------------------|----------------|---------|
|                                                    | AUC                 | R <sup>2</sup> | P value | AUC                 | R <sup>2</sup> | P value | AUC                 | R <sup>2</sup> | P value |
| Psychiatric disorder (Ref = no)                    | 0.60<br>(0.54;0.65) | 0.062          | <0.0001 | 0.64<br>(0.56;0.72) | 0.077          | <0.0001 | 0.61<br>(0.55;0.66) | 0.076          | <0.0001 |
| Any previous losses (no=0;yes=1)                   | 0.59<br>(0.53;0.65) | 0.036          | 0.0006  | 0.64<br>(0.56;0.72) | 0.063          | <0.0001 | 0.57<br>(0.52;0.63) | 0.027          | 0.0026  |
| Ethnicity (5 categories)                           | 0.60<br>(0.54;0.66) | 0.039          | 0.01    | 0.64<br>(0.56;0.71) | 0.061          | 0.005   | 0.56<br>(0.50;0.61) | 0.015          | 0.29    |
| Time to conceive (3 categories)                    | 0.55<br>(0.49;0.60) | 0.010          | 0.20    | 0.57<br>(0.49;0.65) | 0.017          | 0.13    | 0.58<br>(0.52;0.64) | 0.036          | 0.0021  |
| Final diagnosis (miscarriage, ectopic, other)      | 0.53<br>(0.47;0.58) | 0.004          | 0.54    | 0.56<br>(0.48;0.64) | 0.016          | 0.15    | 0.53<br>(0.47;0.58) | 0.005          | 0.42    |
| Final management (surgical, medical, conservative) | 0.51<br>(0.45;0.57) | 0.001          | 0.90    | 0.56<br>(0.48;0.64) | 0.012          | 0.24    | 0.55<br>(0.49;0.60) | 0.011          | 0.15    |
| Fetal Heart (no=0; yes=1) (Miscarriage only)       | 0.52<br>(0.45;0.59) | 0.002          | 0.76    | 0.55<br>(0.46;0.64) | 0.010          | 0.37    | 0.53<br>(0.46;0.59) | 0.007          | 0.40    |
| Age (in years)                                     | 0.50<br>(0.44;0.56) | 0.000          | 0.89    | 0.55<br>(0.46;0.63) | 0.005          | 0.26    | 0.52<br>(0.46;0.58) | 0.000          | 0.78    |
| Education (5 categories)                           | 0.54<br>(0.48;0.60) | 0.013          | 0.39    | 0.55<br>(0.47;0.63) | 0.033          | 0.09    | 0.53<br>(0.47;0.58) | 0.004          | 0.85    |
| Overnight admission (no=0;yes=1)                   | 0.54<br>(0.48;0.60) | 0.011          | 0.06    | 0.52<br>(0.44;0.60) | 0.002          | 0.5     | 0.52<br>(0.46;0.57) | 0.002          | 0.39    |
| Previous termination (no=0;yes=1)                  | 0.54<br>(0.48;0.60) | 0.008          | 0.11    | 0.56<br>(0.48;0.64) | 0.015          | 0.05    | 0.53<br>(0.47;0.59) | 0.005          | 0.19    |
| Previous children (no=0;yes=1)                     | 0.51<br>(0.45;0.57) | 0.000          | 0.68    | 0.52<br>(0.44;0.60) | 0.002          | 0.53    | 0.54<br>(0.49;0.60) | 0.009          | 0.09    |
| Days to diagnosis (days)                           | 0.50<br>(0.44;0.56) | 0.001          | 0.67    | 0.54<br>(0.46;0.62) | 0.001          | 0.57    | 0.50<br>(0.45;0.56) | 0.001          | 0.56    |
| IVF pregnancy (no=0;yes=1)                         | 0.51<br>(0.45;0.57) | 0.002          | 0.37    | 0.52<br>(0.44;0.60) | 0.004          | 0.33    | 0.52<br>(0.46;0.57) | 0.004          | 0.25    |
| Gestational age (days)                             | 0.53<br>(0.47;0.60) | 0.005          | 0.25    | 0.54<br>(0.45;0.63) | 0.005          | 0.31    | 0.51<br>(0.44;0.57) | 0.000          | 0.91    |

Abbreviations: IVF – in vitro fertilisation
